# Supplementary material for: Evolutionary Patterns in the Sequence and Structure of Transfer RNA: A Window into Early Translation and the Genetic Code
Source: PubMed Central journal article supplement (PMC2474678; doi:10.1371/journal.pone.0002799), 2008-07-30
Supplement: pone.0002799.s001.pdf [file pone.0002799.s001.pdf]

**Table S1.** Statistics of phylogenetically reconstructed trees of tRNA structures derived from 17 data matrices. Number of taxa analyzed is shown in parentheses. CI = consistency index (with/without uninformative characters), RI = retention index, RC = rescaled consistency index.

| Taxa                                 | No. of trees | Tree length | CI          | RI    | RC    | $g_1$  |
|--------------------------------------|--------------|-------------|-------------|-------|-------|--------|
| <i>Bacillus subtilis</i> (19)        | 1            | 131         | 0.626/0.566 | 0.739 | 0.463 | -0.691 |
| <i>Bos taurus</i> (33)               | 23           | 355         | 0.369       | 0.656 | 0.242 | -0.545 |
| <i>Drosophila melanogaster</i> (13)  | 3            | 166         | 0.633/0.585 | 0.653 | 0.413 | -0.827 |
| <i>Escherichia coli</i> (45)         | 502          | 216         | 0.454/0.413 | 0.761 | 0.345 | -0.589 |
| <i>Halobacterium cutirubrum</i> (12) | 2            | 116         | 0.672/0.604 | 0.568 | 0.382 | -0.537 |
| <i>Haloferax volcanii</i> (41)       | 40           | 209         | 0.450/0.419 | 0.739 | 0.332 | -0.467 |
| <i>Homo sapiens</i> (22)             | 1            | 287         | 0.453/0.416 | 0.588 | 0.266 | -0.422 |
| <i>Lupinus</i> spp. (13)             | 5            | 161         | 0.615/0.566 | 0.523 | 0.322 | -0.450 |
| <i>Mus musculus</i> (17)             | 9            | 186         | 0.618/0.580 | 0.689 | 0.426 | -0.731 |
| <i>Mycoplasma capricolum</i> (29)    | 12           | 168         | 0.548/0.500 | 0.675 | 0.370 | -0.704 |
| <i>Neurospora crassa</i> (10)        | 2            | 158         | 0.658/0.609 | 0.518 | 0.341 | -0.728 |
| <i>Nicotiana</i> (11)                | 2            | 126         | 0.659/0.606 | 0.682 | 0.449 | -0.309 |
| Phage (13)                           | 2            | 145         | 0.662/0.602 | 0.608 | 0.403 | -0.828 |
| <i>Phaseolus vulgaris</i> (21)       | 74           | 170         | 0.606/0.573 | 0.796 | 0.483 | -0.411 |
| <i>Rattus norvegicus</i> (27)        | 10           | 229         | 0.480/0.466 | 0.749 | 0.36  | -0.617 |
| <i>Saccharomyces cerevisiae</i> (51) | 1521         | 383         | 0.339/0.336 | 0.689 | 0.234 | -0.288 |
| <i>Spinacia oleracea</i> (11)        | 6            | 129         | 0.682/0.637 | 0.568 | 0.388 | -0.722 |
