# Supplementary material for: Evolutionary Patterns in the Sequence and Structure of Transfer RNA: A Window into Early Translation and the Genetic Code
Source: PubMed Central journal article supplement (PMC2474678; doi:10.1371/journal.pone.0002799), 2008-07-30

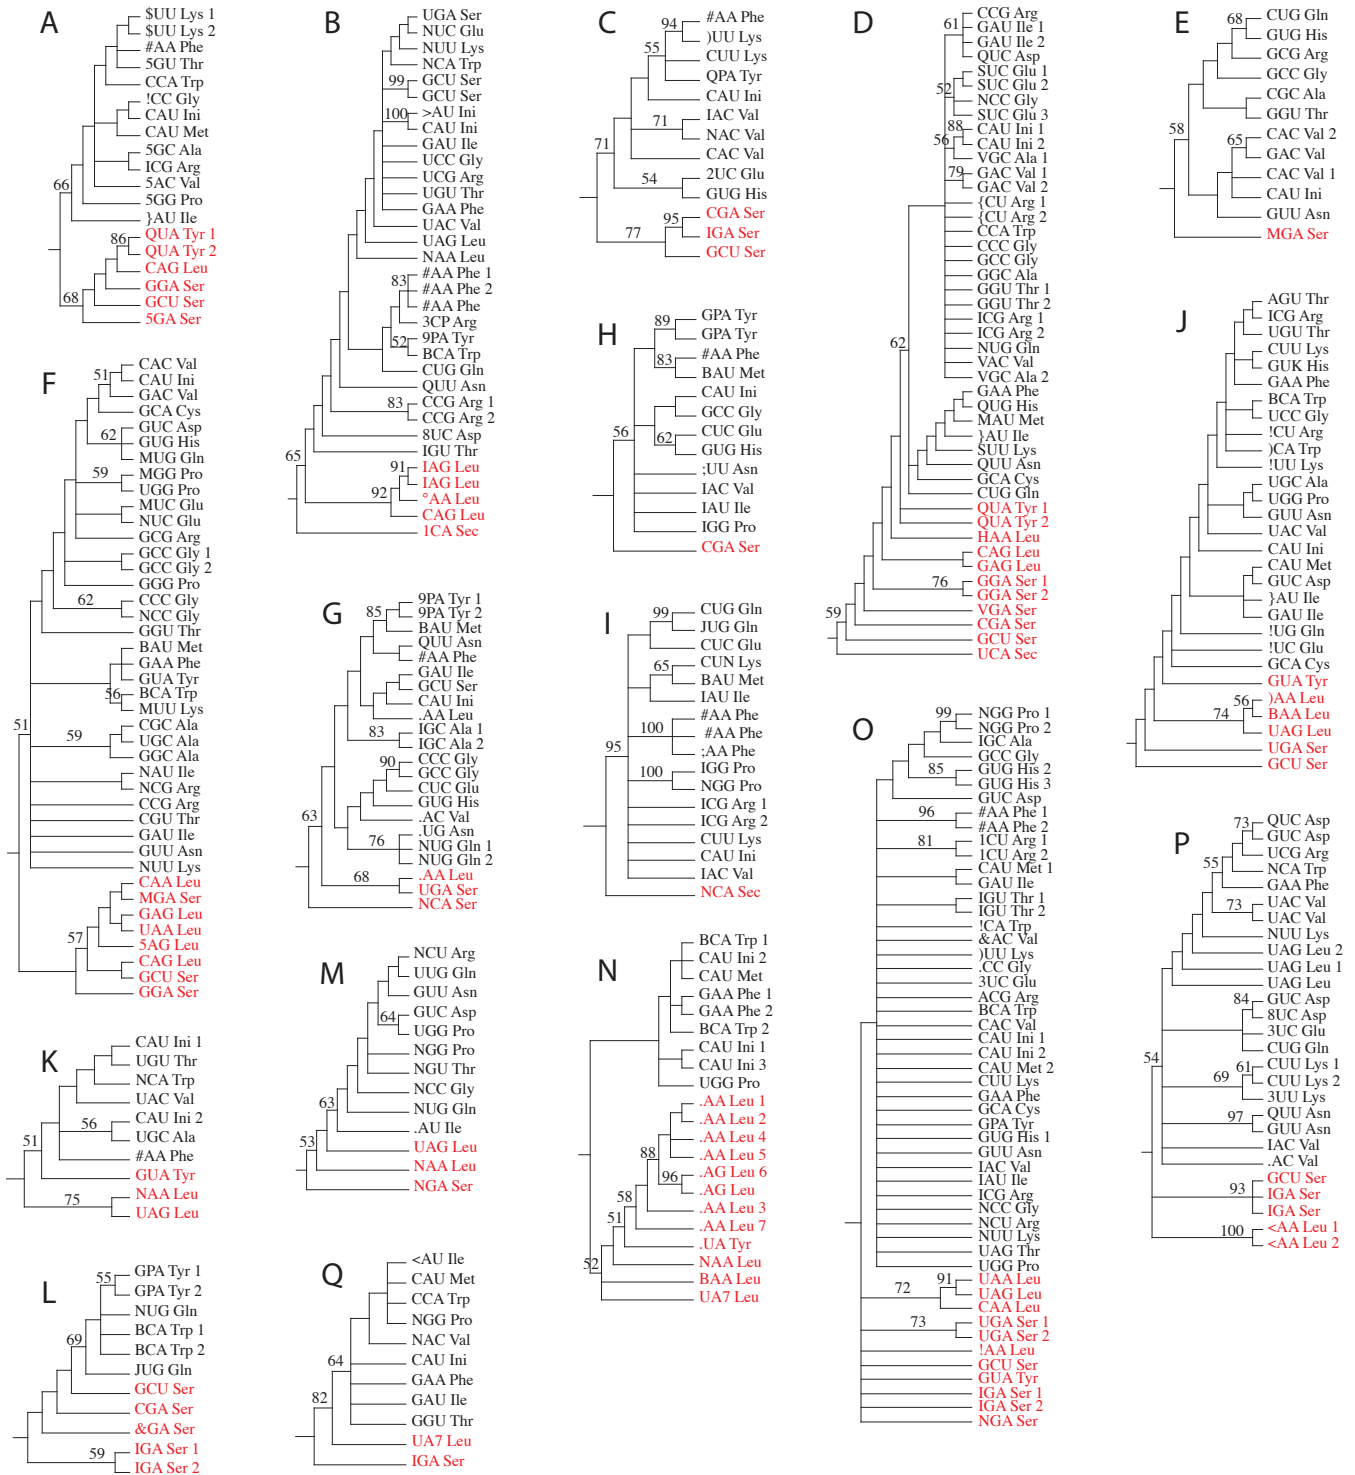

Supplement: pone.0002799.s004.pdf [file pone.0002799.s004.pdf]
